# Supplementary material
Source: publisher figshare collection journal article supplement (https://gsajournals.figshare.com/ndownloader/files/15368198)
Supplement: Supplementary file 1 [file 15368198]

## Sheet: Sheet1
Table S3. Primers used for RNA in situ hybridization probe synthesis
Gene	Forward (5’ to 3’)	Reverse (5’ to 3’)
fgf10a	GTGCAAATGGAAAGTGACTAAGGG	GGCGTAATACGACTCACTATAGGGCTACACGATAGGAATGGGGAGA
en2a	CGACAACATCCTGCGACCAG	GGCGTAATACGACTCACTATAGGGGGTGCTGTGGTTGTACAGTCC
dlx2a	GTACGGCCAGATCAGCTCTTAC	GGCGTAATACGACTCACTATAGGGAATATGGTCCCGGCGCTAAC
has2	GGAGTAGGTGGAGATGTGCAG	TAATACGACTCACTATAGGGAGTTCACCACCACGGTCTTC
alcama	TCCGACTGTGTCTGCTATGG	TAATACGACTCACTATAGGGGGCTTGCCTGTAGGAGTGAGGC
